# Supplementary material for: Xe affinities of water-soluble cryptophanes and the role of confined water
Source: PubMed Central journal article supplement — Chem Sci. 2015 Sep 22;6(12):7238–48. doi: 10.1039/c5sc02401c (PMC5950801; doi:10.1039/c5sc02401c), 2015-09-22
Supplement: SC-006-C5SC02401C-s001.pdf [file SC-006-C5SC02401C-s001.pdf]

## Supporting Information

# Xe Affinities of Water-Soluble Cryptophanes and the Role of Confined Water

Lu Gao,<sup>†</sup> Wenhao Liu,<sup>†</sup> One-Sun Lee,<sup>‡</sup> Ivan J. Dmochowski,<sup>†</sup> Jeffery G. Saven<sup>\*,†</sup>

<sup>†</sup>Department of Chemistry, University of Pennsylvania, 231 S. 34<sup>th</sup> Street, Philadelphia, PA 19104

<sup>‡</sup> Qatar Environment and Energy Research Institute, Qatar Foundation, Doha, Qatar

## Table of Contents

|                                                                                                                                                                                                                                                                                                                                                                                                                                                                                                                                                     |   |
|-----------------------------------------------------------------------------------------------------------------------------------------------------------------------------------------------------------------------------------------------------------------------------------------------------------------------------------------------------------------------------------------------------------------------------------------------------------------------------------------------------------------------------------------------------|---|
| <b>Figure S1.</b> Molecular segments labeled by atom types and electrostatic charges. Segment (A) is the cryptophane backbone and is thus included in all cryptophane molecules. Segment (B) is the carboxyl side-chain in TAAC, <i>m2n2</i> , <i>m2n3</i> and <i>m3n3</i> . Segment (C) is the methyl side chain in TAAC and TTPC. Segment (D) is the additional methylene group in the middle of the propyl linkers of <i>m2n3</i> and <i>m3n3</i> . Segment (E) is the long side chain in TTPC. Segment (F) is the long side chain in TTEC. .... | 2 |
| <b>Figure S2.</b> The histograms of number of water molecules inside the cryptophane cavities. The radius cutoff is set at 4 Å relative to the center of mass of the carbons in the six aromatic rings of each cryptophane molecule. The average numbers of interior water molecules are 0.50 for TTEC, 0.92 for TAAC, 1.01 for TTPC, 1.63 for <i>m2n2</i> , 2.23 for <i>m2n3</i> , and 2.73 for <i>m3n3</i> , respectively. ....                                                                                                                   | 3 |
| <b>Figure S3.</b> Helmholtz free energy changes $\Delta A_1$ and $\Delta A_2$ as functions of the decoupling parameter $\lambda$ . ....                                                                                                                                                                                                                                                                                                                                                                                                             | 4 |
| <b>Figure S4.</b> Water maps for water molecules inside <i>m3n3</i> , <i>m2n3</i> , <i>m2n2</i> , TTPC and TAAC. Side view (top) and top view (bottom) of same configuration in each case. For each position cluster marked by a blue wireframe sphere with radius of 1 Å, 1 water molecule representing the highest orientation cluster is shown. ....                                                                                                                                                                                             | 5 |
| <b>Table S1.</b> Bond Parameters <sup>b</sup> .....                                                                                                                                                                                                                                                                                                                                                                                                                                                                                                 | 6 |
| <b>Table S2.</b> Residence Time of Water Molecules Inside the Cryptophane Molecules <sup>a</sup> .....                                                                                                                                                                                                                                                                                                                                                                                                                                              | 8 |

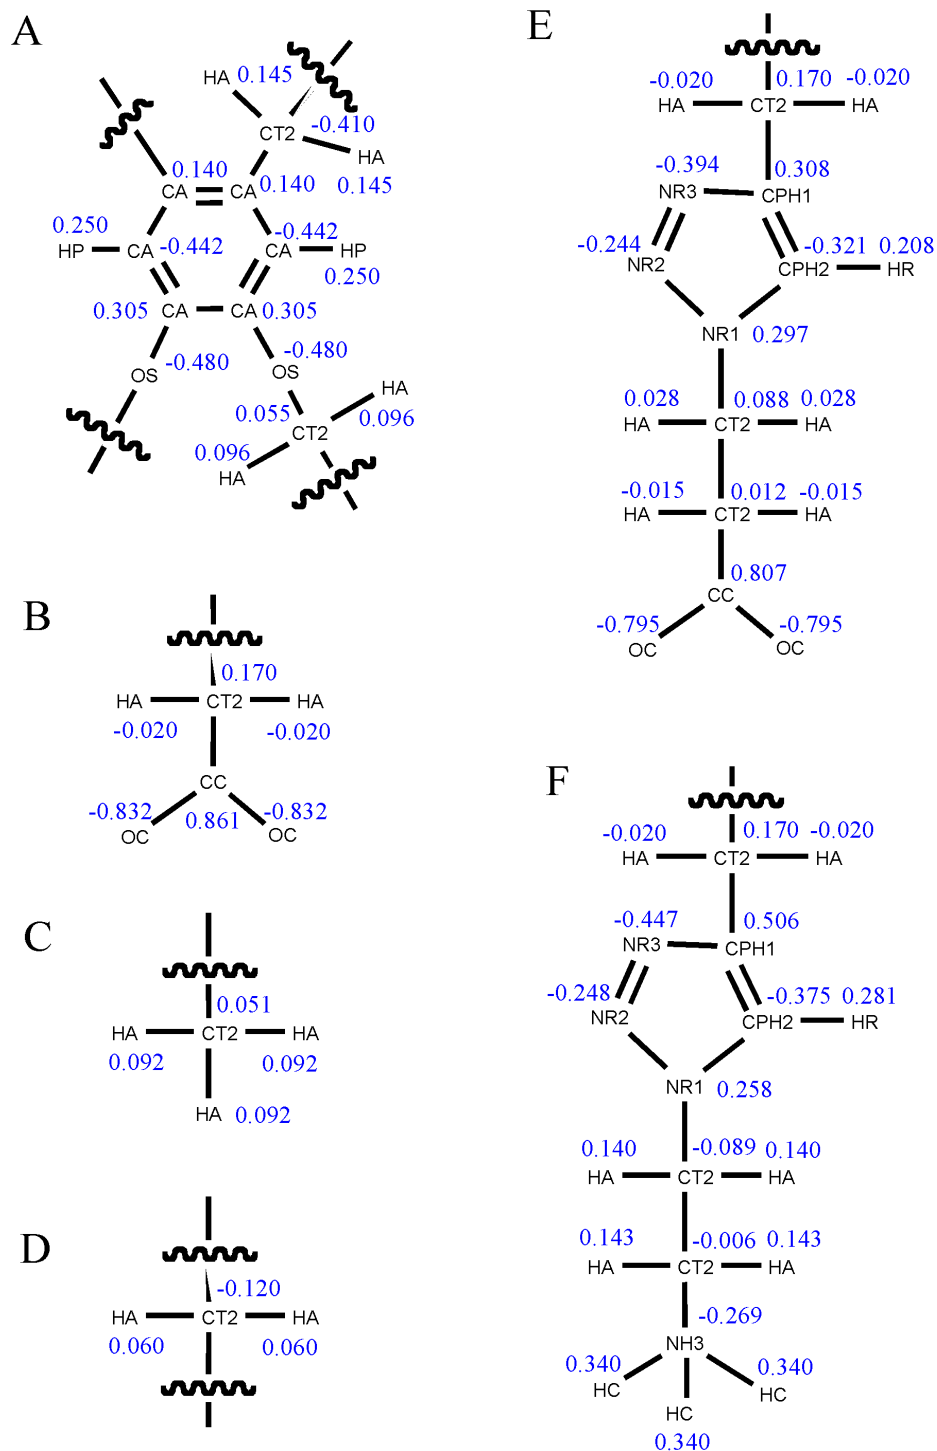

**Figure S1.** Molecular segments labeled by atom types and electrostatic charges. Segment **(A)** is the cryptophane backbone and is thus included in all cryptophane molecules. Segment **(B)** is the carboxyl side chain in TAAC, *m2n2*, *m2n3* and *m3n3*. Segment **(C)** is the methyl side chain in TAAC and TTPC. Segment **(D)** is the additional methylene group in the middle of the propyl linkers of *m2n3* and *m3n3*. Segment **(E)** is the long side chain in TTPC. Segment **(F)** is the long side chain in TTEC.

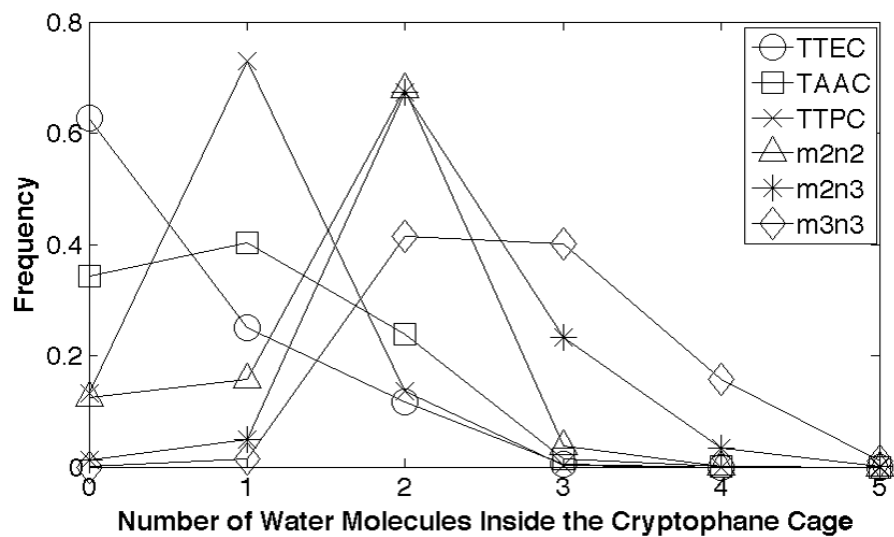

**Figure S2.** The histograms of number of water molecules inside the cryptophane molecules. The radius cutoff is set at 4 Å relative to the center of mass of the carbons in the six aromatic rings of each cryptophane molecule. The average numbers of interior water molecules are 0.50 for TTEC, 0.92 for TAAC, 1.01 for TTPC, 1.63 for *m2n2*, 2.23 for *m2n3*, and 2.73 for *m3n3*, respectively.

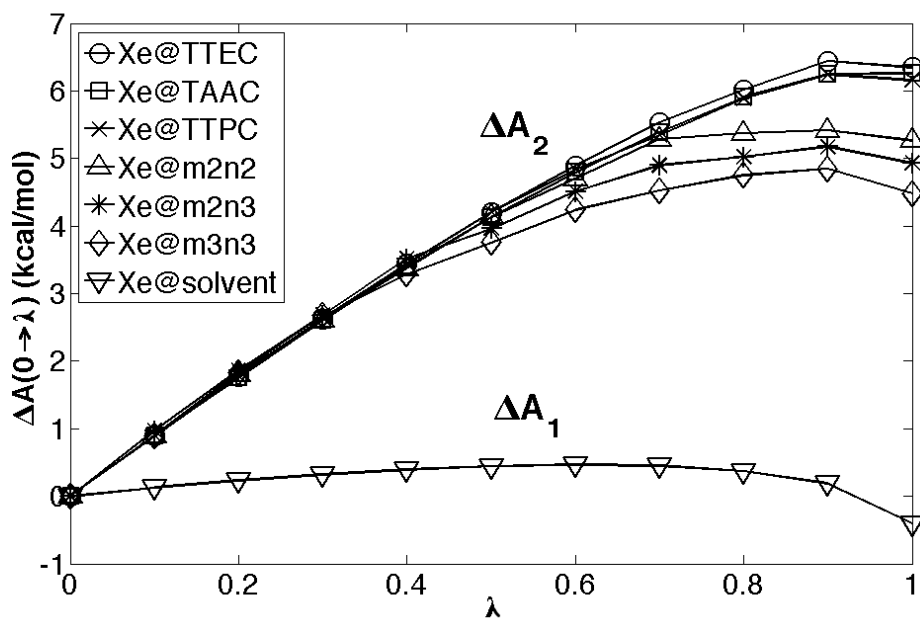

**Figure 3.** Helmholtz free energy changes  $\Delta A_1$  and  $\Delta A_2$  as functions of the decoupling parameter  $\lambda$ .

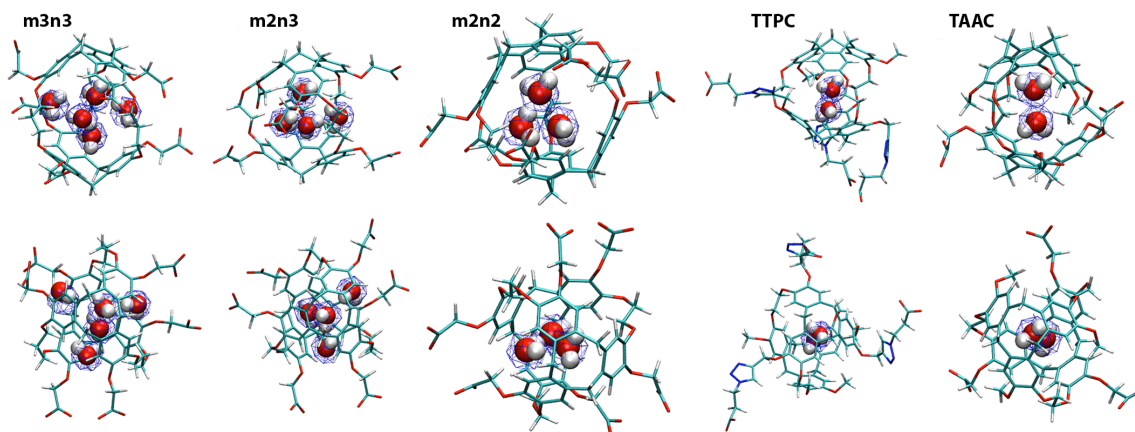

**Figure 4.** Water maps for water molecules inside  $m3n3$ ,  $m2n3$ ,  $m2n2$ , TTPC and TAAC. Side view (**top**) and top view (**bottom**). For each position cluster marked by a blue wireframe sphere with radius of 1 Å, 1 water molecule representing the highest orientation cluster is shown.

**Table 1.** Potential energy (force field) parameters<sup>b</sup>

| <b>bond</b>            | $b_0$ (Å)        | $k_b$ (kcal/mol/ Å <sup>2</sup> )        |
|------------------------|------------------|------------------------------------------|
| CA—OS <sup>a</sup>     | 1.364            | 450                                      |
| CT2—CPH1               | 1.480            | 324                                      |
| CPH1—CPH2              | 1.388            | 366                                      |
| CPH1—NR3               | 1.364            | 325                                      |
| CPH2—NR1               | 1.356            | 379                                      |
| CPH2—HR                | 1.086            | 332                                      |
| NR1—NR2                | 1.356            | 280                                      |
| NR1—CT2                | 1.472            | 286                                      |
| NR2—NR3                | 1.338            | 306                                      |
| <b>angle</b>           | $\theta_0$ (deg) | $k_\theta$ (kcal/mol/ rad <sup>2</sup> ) |
| CA—OS—CT2 <sup>a</sup> | 113              | 35                                       |
| CA—CT2—CA <sup>a</sup> | 114              | 80                                       |
| CA—CA—OS <sup>a</sup>  | 120              | 70                                       |
| OS—CT2—CC <sup>a</sup> | 110              | 80                                       |
| OS—CT2—CPH1            | 110              | 50                                       |
| HA—CT2—CPH1            | 109              | 29                                       |
| CT2—CPH1—CPH2          | 129              | 26                                       |
| CT2—CPH1—NR3           | 121              | 29                                       |
| CPH2—CPH1—NR3          | 110              | 30                                       |
| CPH1—CPH2—NR1          | 104              | 25                                       |
| CPH1—CPH2—HR           | 134              | 18                                       |
| NR1—CPH2—HR            | 122              | 20                                       |
| CPH2—NR1—NR2           | 112              | 33                                       |
| CPH2—NR1—CT2           | 129              | 27                                       |
| NR2—NR1—CT2            | 119              | 30                                       |
| NR1—NR2—NR3            | 107              | 46                                       |
| CPH1—NR3—NR2           | 108              | 44                                       |
| NR1—CT2—HA             | 108              | 34                                       |
| NR1—CT2—CT2            | 110              | 50                                       |

| <b>dihedral angle</b>     | $\delta$ (deg) | $k_\delta$ (kcal/mol) | $n$ |
|---------------------------|----------------|-----------------------|-----|
| CT2—OS—CA—CA <sup>a</sup> | 180            | 0.90                  | 2   |
| NR1—NR2—NR3—CPH1          | 180            | 3.82                  | 1   |
| X—CT2—CPH1—X              | 0              | 0                     | 2   |
| X—CT2—NR1—X               | 0              | 0                     | 2   |
| X—CPH1—CPH2—X             | 180            | 5.38                  | 2   |
| X—CPH1—NR3—X              | 180            | 2.40                  | 2   |
| X—CPH2—NR1—X              | 180            | 0.62                  | 2   |
| X—NR1—NR2—X               | 180            | 0.77                  | 2   |

  

| <b>improper</b> | $\omega_0$ (deg) | $k_\omega$ (kcal/mol/ rad <sup>2</sup> ) |
|-----------------|------------------|------------------------------------------|
| CA OS CA CA     | 0                | 10                                       |

<sup>a</sup> Previous calculated results<sup>1</sup>

<sup>b</sup> The results are then formatted into CHARMM type as

$$U_{\text{bonded}} = \sum_{\text{bonds}} k_b (b - b_0)^2 + \sum_{\text{angles}} k_\theta (\theta - \theta_0)^2 + \sum_{\text{dihedrals}} k_\phi [1 + \cos(n\phi - \delta)] + \sum_{\text{impropers}} k_\omega (\omega - \omega_0)^2$$

(1) Kirchhoff, P.; Bass, M.; Hanks, B.; Briggs, J.; Collet, A.; McCammon, J. J. *Am. Chem. Soc.* **1996**, *118*, 3237.

**Table 2.** Residence Time of Water Molecules Inside the Cryptophane Molecules<sup>a</sup>

|      | Residence Time (ps) |               |
|------|---------------------|---------------|
|      | Average Value       | Maximum Value |
| TTEC | 36.04               | 2014.8        |
| TAAC | 35.41               | 1011.4        |
| TTPC | 84.69               | 2338.4        |
| m2n2 | 33.11               | 2507.6        |
| m2n3 | 19.90               | 1862.4        |
| m3n3 | 17.50               | 2012.6        |

<sup>a</sup> The radius cutoff is set at 4 Å relative to the mass weighted center of cryptophane molecules.
